# Supplementary material for: Cholera diagnosis in human stool and detection in water: A systematic review and meta-analysis
Source: PubMed Central journal article supplement (PMC9258865; doi:10.1371/journal.pone.0270860), 2022-07-06
Supplement: pone.0270860.s004.pdf [file pone.0270860.s004.pdf]

# 1 Appendix S4: Summary of Findings for individual studies

## 2 Immunologically-based tests: Crystal VC

3 *Table 1. Sensitivity and specificity results for individual studies reporting on Crystal VC*

| <b>Test: Crystal VC (Institut Pasteur/Spain Diagnostics)</b>         |          |                                         |                                 |                                 |
|----------------------------------------------------------------------|----------|-----------------------------------------|---------------------------------|---------------------------------|
| <b>Intended Location: Field</b>                                      |          |                                         |                                 |                                 |
| <b>Target: lipopolysaccharide antigen of V. cholerae O1 and O139</b> |          |                                         |                                 |                                 |
| <b>Reference test: Bacterial Culture</b>                             |          |                                         |                                 |                                 |
| <b>Sample type: Stool</b>                                            |          |                                         |                                 |                                 |
| <b>Study ID</b>                                                      | <b>n</b> | <b>Enrichment details (if relevant)</b> | <b>Sensitivity</b>              | <b>Specificity</b>              |
| <i>Direct Samples</i>                                                |          |                                         |                                 |                                 |
| George 2014                                                          | 125      |                                         | 65.6 (52.7-77.1)                | 91.8 (81.9-97.3)                |
| Page 2012 (lab technicians)                                          | 256      |                                         | 93.0 (88.3-96.6)                | 85.2 (69.8-99.2)                |
| Page 2012 (clinicians)                                               | 255      |                                         | 93.8 (89.2-97.2) <sup>1,4</sup> | 78.4 (59.6-98.7) <sup>1,4</sup> |
| Ley 2012                                                             | 622      |                                         | 93.1 (88.7-96.2) <sup>4</sup>   | 49.2 (44.3-54.1) <sup>4</sup>   |
| Mukherjee 2010                                                       | 212      |                                         | 91.70                           | 72.90                           |
| Islam 2019                                                           | 5865     |                                         | 72.2 (64.6-78.9)                | 77.1 (75.9-78.2)                |
| Sayeed 2018                                                          | 76       |                                         | 97.5 (87.5-99.9) <sup>4</sup>   | 98.4 (92.0-99.9) <sup>4</sup>   |
| Matias 2017                                                          | 511      |                                         | 98.6 (96.5-99.6)                | 71.1 (64.6-76.9)                |
| <i>Enriched samples</i>                                              |          |                                         |                                 |                                 |
| George 2014                                                          | 125      | 6h enrichment in APW                    | 75 (62.6-85)                    | 98.4 (91.2-100)                 |
| Bwire 2017                                                           | 102      | 6h enrichment in APW                    | 98.9 (94.09-99.97)              | 90 (55.5-99.75)                 |
| Islam 2019                                                           | 614      | Overnight enrichment in APW             | 68.3 (51.9-81.9)                | 90.8 (88.1-92.9)                |
| <b>Sample type: Water</b>                                            |          |                                         |                                 |                                 |
| <i>Enriched samples</i>                                              |          |                                         |                                 |                                 |
| Rashid 2017 <sup>2</sup>                                             | 1648     | 18h enrichment in APW                   | 65.6 (55.2-75)                  | 99.6 (99.2-99.9)                |
| Chakraborty 2013                                                     | 550      | 24h incubation in APW                   | 87 (74.9-94.3) <sup>1</sup>     | 100 (99-100) <sup>1</sup>       |

| <b>Reference test: PCR</b>            |     |                        |                               |                               |
|---------------------------------------|-----|------------------------|-------------------------------|-------------------------------|
| <b>Sample type: Stool</b>             |     |                        |                               |                               |
| <i>Direct Samples</i>                 |     |                        |                               |                               |
| Ontweka 2016                          | 100 |                        | 94.4 (81.3-99.3)              | 79.7 (67.8-88.7)              |
| Harris 2009                           | 99  |                        | 97 (88.7-99.5)                | 75 (56.2-87.9) <sup>3</sup>   |
| <i>Enriched Samples</i>               |     |                        |                               |                               |
| Ontweka 2016                          | 100 | 4-6h enrichment in APW | 86.1 (70.5-95.3)              | 100 (94.4-100)                |
| Debes 2016                            | 673 | 24h enrichment in APW  | 89.3 (71.8-97.7) <sup>3</sup> | 98.9 (97.8-99.6) <sup>3</sup> |
| <b>Reference test: Culture or PCR</b> |     |                        |                               |                               |
| <b>Sample type: Stool</b>             |     |                        |                               |                               |
| <i>Direct Samples</i>                 |     |                        |                               |                               |
| Page 2012 (lab technicians)           | 256 |                        | 88.2 (82.6-92.4)              | 88.6 (78.7-94.9)              |
| Page 2012 (clinicians)                | 255 |                        | 91.9 (87-95.4)                | 82.6 (71.6-90.7)              |

<sup>1</sup>Confidence Intervals not provided; calculated from raw numbers

<sup>2</sup>Combined supply and stored water

<sup>3</sup>Sensitivity and specificity re-calculated using raw numbers due to errors in paper

<sup>4</sup> Estimated by Bayesian Latent Modelling

4

5

6 Figure 1. Plot of sensitivities and specificities for individual studies. Each dot represents a single study result, sub-grouped by colour according to 'reference test – sample type – enrichment  
7 status' as per the legend below. Error bars show 95% Confidence Intervals.

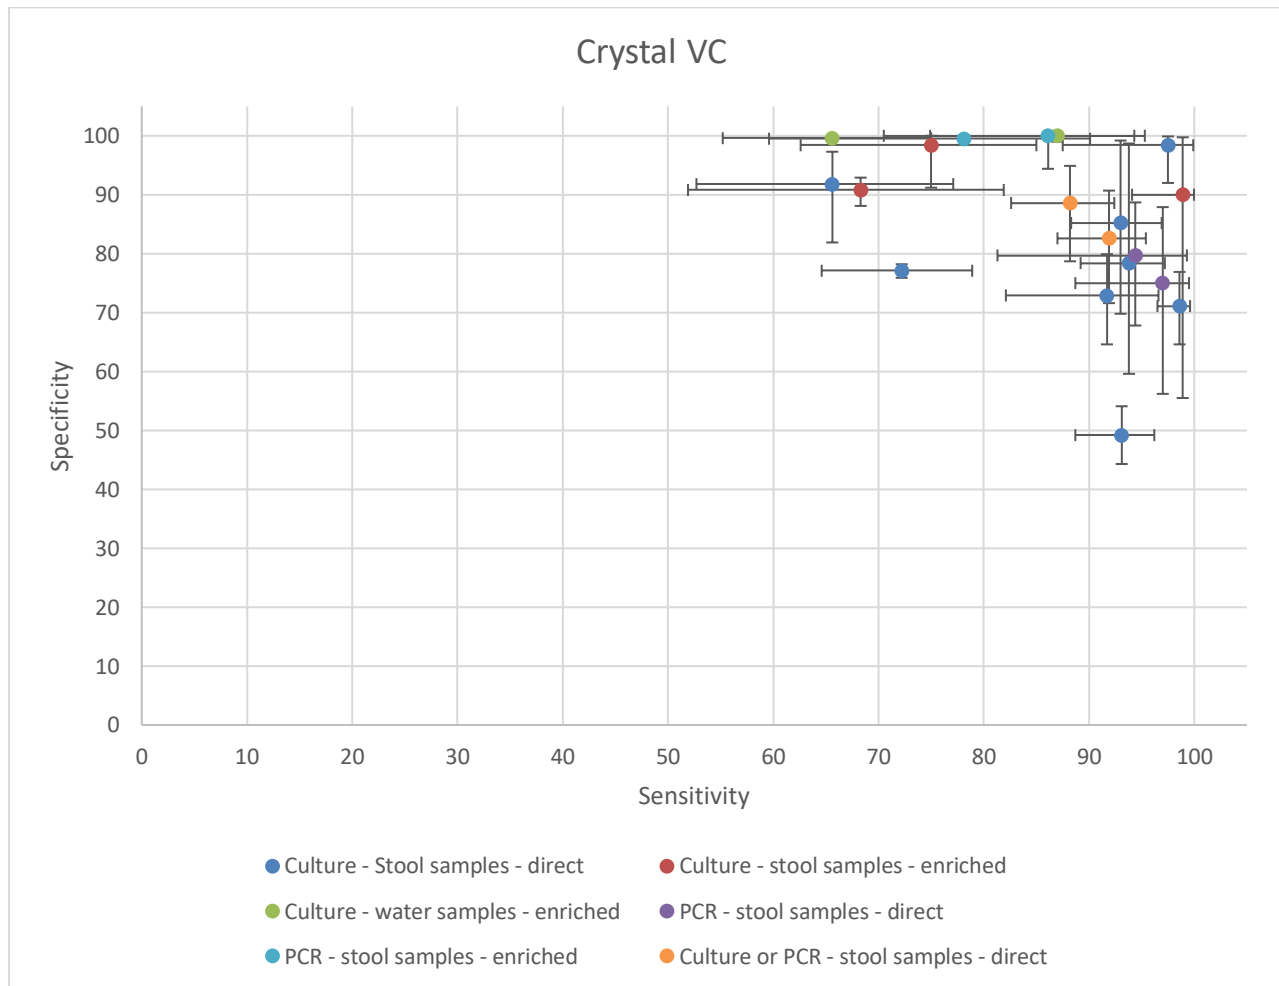

8

9 **Immunologically-based tests: CholeraSMART**

10 *Table 2. Sensitivity and specificity results for individual studies reporting on Cholera SMART*

| <b>Test: Cholera SMART (New Horizons Diagnostics)</b>         |          |                                         |                             |                             |
|---------------------------------------------------------------|----------|-----------------------------------------|-----------------------------|-----------------------------|
| <b>Intended Location: Field</b>                               |          |                                         |                             |                             |
| <b>Target: Antigen A of V. cholerae O1 lipopolysaccharide</b> |          |                                         |                             |                             |
| <b>Reference test: Bacterial Culture</b>                      |          |                                         |                             |                             |
| <b>Sample type: Stool</b>                                     |          |                                         |                             |                             |
| <b>Study ID</b>                                               | <b>n</b> | <b>Enrichment details (if relevant)</b> | <b>Sensitivity</b>          | <b>Specificity</b>          |
| <i>Direct Samples</i>                                         |          |                                         |                             |                             |
| Bolaños 2004                                                  | 28       |                                         | 100 (74.7-100) <sup>1</sup> | 100 (71.7-100) <sup>1</sup> |
| Hasan 1994b (Bangladesh)                                      | 44       |                                         | 95.6 (76-99.8) <sup>1</sup> | 100 (80.8-100) <sup>1</sup> |
| Kalluri 2006 (lab technicians)                                | 254      |                                         | 83 (75-90)                  | 88 (82-93)                  |
| Kalluri 2006 (field technicians)                              | 212      |                                         | 58 (46-71)                  | 95 (91-98)                  |
| <b>Reference test: Cholera Screen</b>                         |          |                                         |                             |                             |
| <b>Sample type: Stool</b>                                     |          |                                         |                             |                             |
| <i>Direct Samples</i>                                         |          |                                         |                             |                             |
| Hasan 1994b (Mexico)                                          | 108      |                                         | 100 (90.2-100) <sup>1</sup> | 100 (92.8-100) <sup>1</sup> |

11 <sup>1</sup>Confidence Intervals not provided; calculated from raw numbers

12 Figure 2. Plot of sensitivities and specificities for individual studies. Each dot represents a single study result, sub-grouped by colour according to 'reference test – sample type – enrichment  
13 status' as per the legend below. Error bars show 95% Confidence Intervals

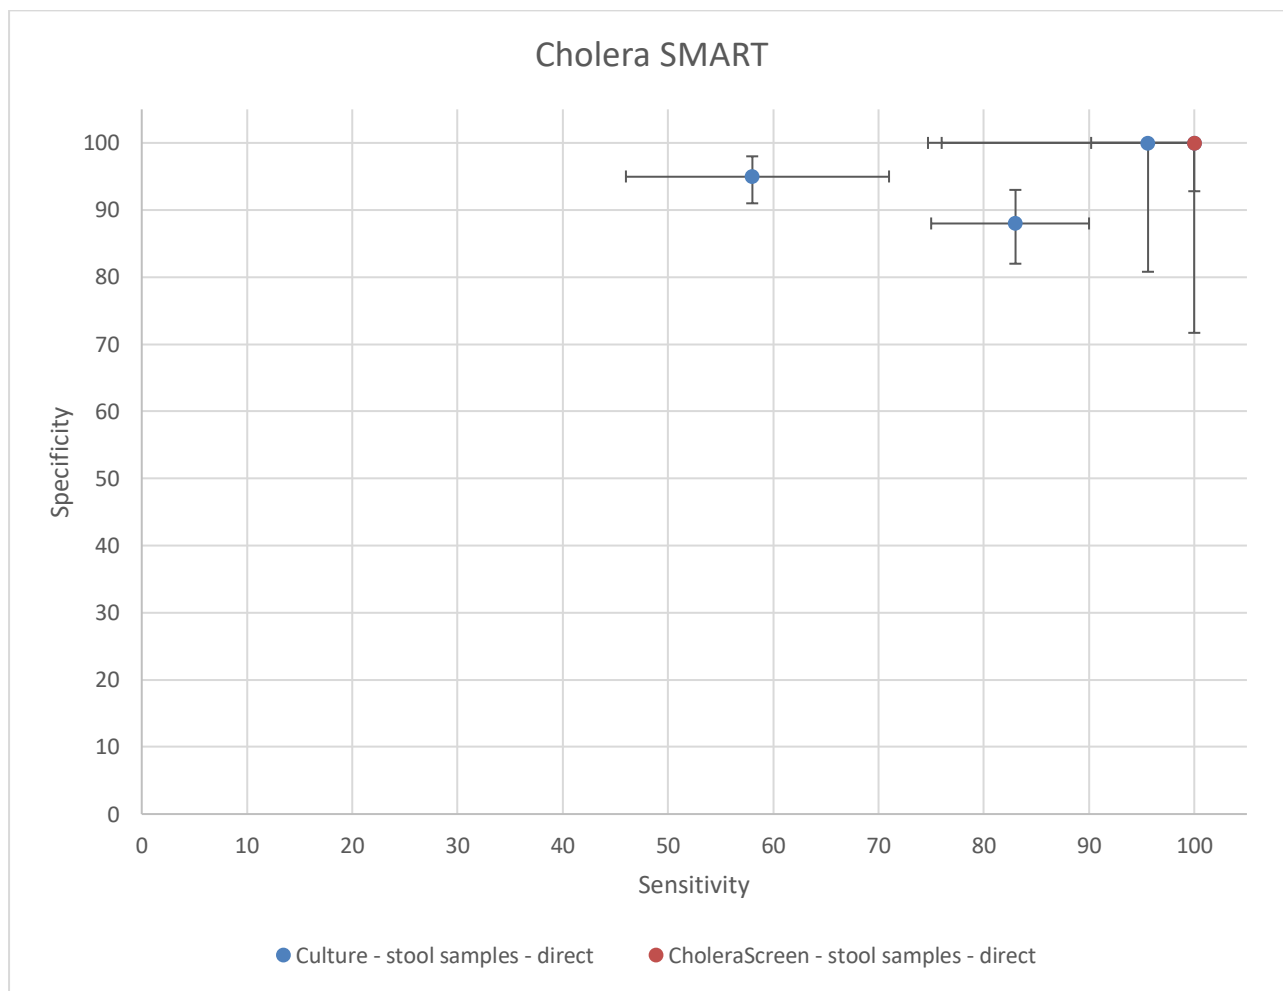

14

15

16 **Immunologically-based tests: IP Dipstick**

17 *Table 3. Sensitivity and specificity results for individual studies reporting on IP Dipstick*

| <b>Test: IP Dipstick (Institut Pasteur)</b>         |          |                                         |                               |                               |
|-----------------------------------------------------|----------|-----------------------------------------|-------------------------------|-------------------------------|
| <b>Intended Location: Field</b>                     |          |                                         |                               |                               |
| <b>Target: V. cholerae O1 lipopolysaccharide</b>    |          |                                         |                               |                               |
| <b>Reference test: Bacterial Culture</b>            |          |                                         |                               |                               |
| <b>Sample type: Stool</b>                           |          |                                         |                               |                               |
| <b>Study ID</b>                                     | <b>n</b> | <b>Enrichment details (if relevant)</b> | <b>Sensitivity</b>            | <b>Specificity</b>            |
| <i>Direct Samples</i>                               |          |                                         |                               |                               |
| Wang 2006                                           | 172      |                                         | 93 (87-99)                    | 77 (69-85)                    |
| Kalluri 2006 (field technicians)                    | NR       |                                         | 93 (87-97)                    | 67 (60-74)                    |
| Kalluri 2006 (lab technicians)                      | NR       |                                         | 94 (88-98)                    | 76 (70-82)                    |
| Nato 2003 (Madagascar)                              | 140      |                                         | 98.5 (90.7-99.9) <sup>1</sup> | 95.9 (87.8-98.9) <sup>1</sup> |
| Nato 2003 (Bangladesh)                              | 102      |                                         | 94.2 (83.1-98.5) <sup>1</sup> | 84 (70.3-92.4) <sup>1</sup>   |
| <i>Enriched Samples</i>                             |          |                                         |                               |                               |
| Wang 2006                                           | 219      | 6h in APW                               | 97 (93-100)                   | 97 (95-100)                   |
| Bhuiyan 2003                                        | 133      | 4h in APW                               | 97 (88.7-99.5) <sup>1</sup>   | 92.4 (82.5-97.2) <sup>1</sup> |
| <b>Target: V. cholerae O139 lipopolysaccharides</b> |          |                                         |                               |                               |
| <b>Reference test: Bacterial Culture</b>            |          |                                         |                               |                               |
| <b>Sample type: Stool</b>                           |          |                                         |                               |                               |
| <i>Direct Samples</i>                               |          |                                         |                               |                               |
| Nato 2003 (Bangladesh)                              | 158      |                                         | 100 (95-100) <sup>1</sup>     | 92.5 (82.7-97.2) <sup>1</sup> |
| <i>Enriched Samples</i>                             |          |                                         |                               |                               |
| Bhuiyan 2003                                        | 134      | 4h in APW                               | 92.6 (74.2-98.7) <sup>1</sup> | 98.1 (92.8-99.7) <sup>1</sup> |

<sup>1</sup> Confidence Intervals not provided; calculated from raw numbers

18

19 Figure 3. Plot of sensitivities and specificities for individual studies. Each dot represents a single study result, sub-grouped by colour according to 'serotype - reference test – sample type –  
20 enrichment status' as per the legend below. Error bars show 95% Confidence Intervals

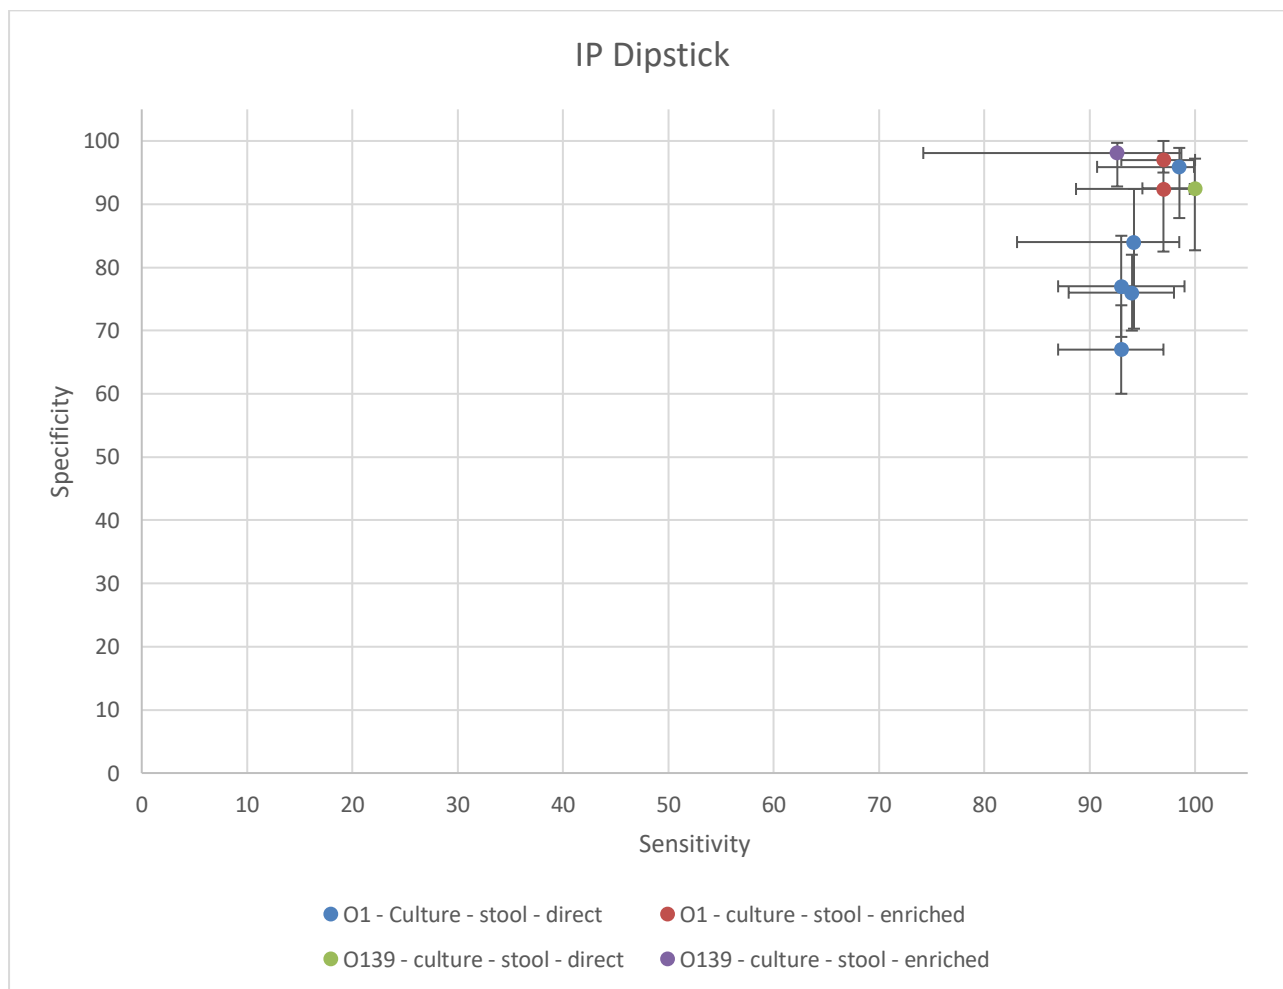

21

22

23 **Immunologically-based tests: Cholera Screen**

24 *Table 4. Sensitivity and specificity results for individual studies reporting on Cholera Screen*

| <b>Test: Cholera Screen</b>                                    |          |                                         |                               |                               |
|----------------------------------------------------------------|----------|-----------------------------------------|-------------------------------|-------------------------------|
| <b>Intended Location: Field</b>                                |          |                                         |                               |                               |
| <b>Target: 'A' factor of V. cholerae lipopolysaccharide O1</b> |          |                                         |                               |                               |
| <b>Reference test: Bacterial Culture</b>                       |          |                                         |                               |                               |
| <b>Sample type: Stool</b>                                      |          |                                         |                               |                               |
| <b>Study ID</b>                                                | <b>n</b> | <b>Enrichment details (if relevant)</b> | <b>Sensitivity</b>            | <b>Specificity</b>            |
| <i>Direct Samples</i>                                          |          |                                         |                               |                               |
| Colwell 1992 (Guatemala)                                       | 17       |                                         | 100 (65.5-100) <sup>1</sup>   | 42.9 (11.8-79.8) <sup>1</sup> |
| Colwell 1992 (Bangladesh)                                      | 77       |                                         | 98 (88-99.9) <sup>1</sup>     | 77.8 (57.3-90.6) <sup>1</sup> |
| Carillo 1994                                                   | 99       |                                         | 98.8 (92.4-99.9) <sup>1</sup> | 22.2 (7.4-48.1) <sup>1</sup>  |
| Islam 1994                                                     | 57       |                                         | 100 (39.58-100) <sup>1</sup>  | 100 (91.58-100) <sup>1</sup>  |

<sup>1</sup> Confidence Intervals not provided; calculated from raw numbers

25



26 Figure 4. Plot of sensitivities and specificities for individual studies. Each dot represents a single study result, sub-grouped by colour according to 'reference test – sample type – enrichment  
27 status' as per the legend below. Error bars show 95% Confidence Intervals

28

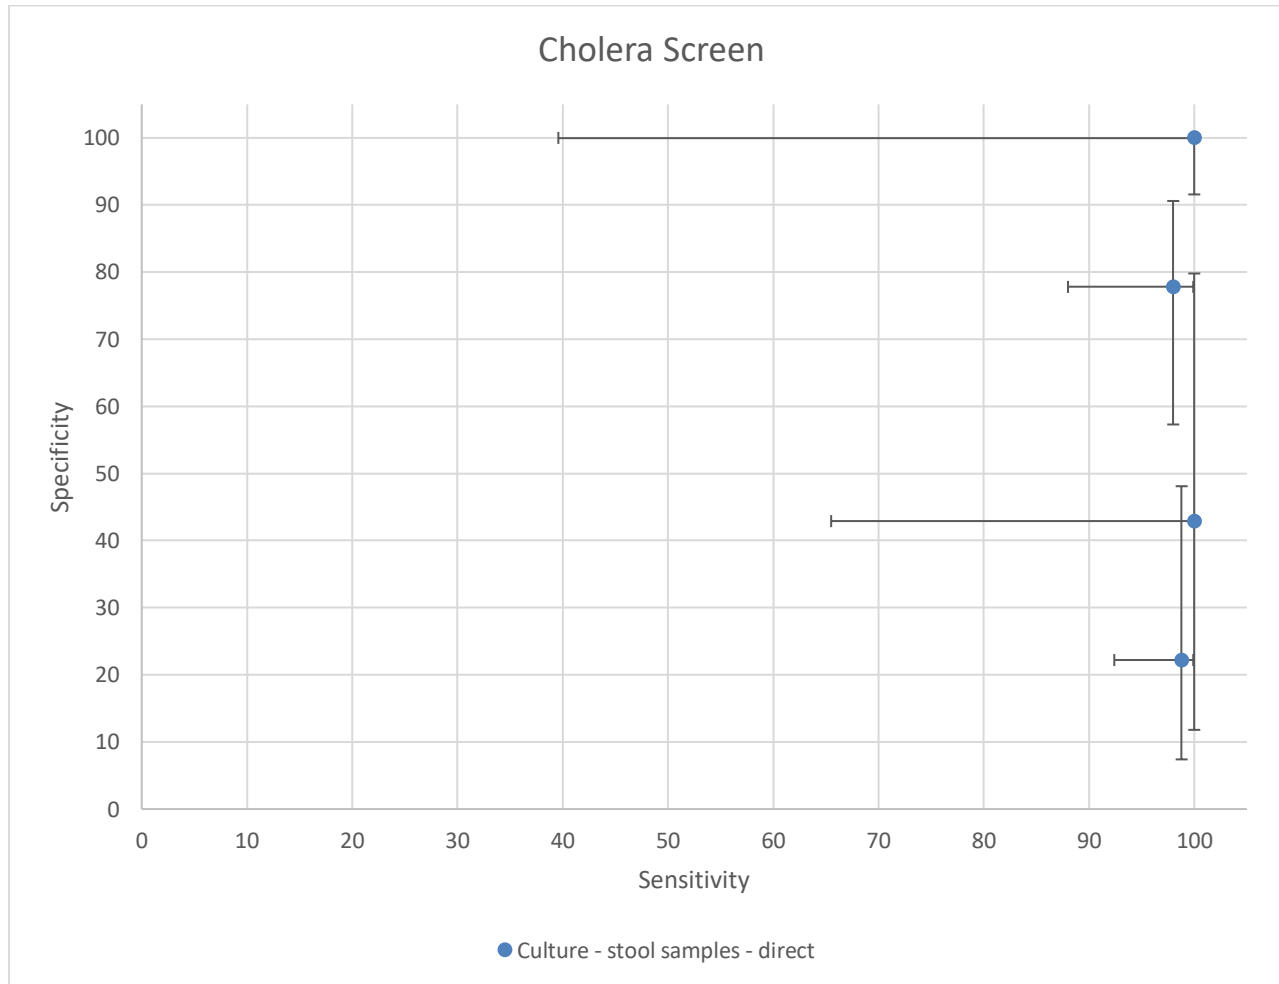

29

30

31 **Immunologically-based tests: ELISA-based tests**32 *Table 5. Sensitivity and specificity results for individual studies reporting on ELISA-based tests*

| <b>Test: ELISA-based tests - two-tip dipstick sandwich ELISA</b>                      |          |                                                       |                               |                             |
|---------------------------------------------------------------------------------------|----------|-------------------------------------------------------|-------------------------------|-----------------------------|
| <b>Intended Location: field</b>                                                       |          |                                                       |                               |                             |
| <b>Target: V. cholerae O1 and O139 (Stool); Ctx b and ompw of O1 and O139 (water)</b> |          |                                                       |                               |                             |
| <b>Reference test: Culture</b>                                                        |          |                                                       |                               |                             |
| <b>Sample type: Stool or water</b>                                                    |          |                                                       |                               |                             |
| <b>Study ID</b>                                                                       | <b>n</b> | <b>Enrichment and sub-group details (if relevant)</b> | <b>Sensitivity</b>            | <b>Specificity</b>          |
| <i>Enriched Samples</i>                                                               |          |                                                       |                               |                             |
| Tuteja 2007 (Stool samples)                                                           | 75       | 4h in APW                                             | 100 (91.4-100) <sup>1</sup>   | 100 (82.2-100) <sup>1</sup> |
| Tuteja 2007 (Water samples)                                                           | 50       | 4h in APW                                             | 100 (31-100) <sup>1</sup>     | 100 (90.6-100) <sup>1</sup> |
| <b>Test: ELISA-based tests - Cholera diagnostic kit (Mab-based dot-blot ELISA)</b>    |          |                                                       |                               |                             |
| <b>Intended Location: field</b>                                                       |          |                                                       |                               |                             |
| <b>Target: V cholerae O1 antigen A</b>                                                |          |                                                       |                               |                             |
| <b>Reference test: Culture</b>                                                        |          |                                                       |                               |                             |
| <b>Sample type: Stool</b>                                                             |          |                                                       |                               |                             |
| <i>Enriched Samples</i>                                                               |          |                                                       |                               |                             |
| Supawat 1994 (Diarrhoeic patients)                                                    | 211      | 4h in APW                                             | 100 (73.2-100) <sup>1</sup>   | 100 (97.6-100) <sup>1</sup> |
| Supawat 1994 (Household contacts)                                                     | 415      | 4h in APW                                             | 95.2 (74.1-99.8) <sup>1</sup> | 100 (98.8-100) <sup>1</sup> |
| <b>Test: ELISA-based tests - dot-blot ELISA</b>                                       |          |                                                       |                               |                             |
| <b>Intended Location: laboratory</b>                                                  |          |                                                       |                               |                             |
| <b>Target: V. cholerae O1 antigen or V. cholerae O139 antigen</b>                     |          |                                                       |                               |                             |
| <b>Reference test: Culture</b>                                                        |          |                                                       |                               |                             |
| <b>Sample type: Stool</b>                                                             |          |                                                       |                               |                             |
| <i>Direct Samples</i>                                                                 |          |                                                       |                               |                             |
| Chaicumpa 1995                                                                        | 147      | O1 antigen                                            | 63 (53.1-71.3) <sup>1</sup>   | 97 (82-99.8) <sup>1</sup>   |

| <i>Enriched Samples</i>                     |      |              |                               |                                |
|---------------------------------------------|------|--------------|-------------------------------|--------------------------------|
| Chaicumpa 1998                              | 6497 | O139 antigen | 100 (89.6-100) <sup>1</sup>   | 99.95 (99.8-99.9) <sup>1</sup> |
| <b>Test: ELISA-based tests - bead ELISA</b> |      |              |                               |                                |
| <b>Intended Location: laboratory</b>        |      |              |                               |                                |
| <b>Target: Cholera toxin</b>                |      |              |                               |                                |
| <b>Reference test: Culture</b>              |      |              |                               |                                |
| <b>Sample type: Stool</b>                   |      |              |                               |                                |
| <i>Direct Samples</i>                       |      |              |                               |                                |
| Ramamurthy 1996 (PAb-based)                 | 95   |              | 82.1 (71.1-89.8) <sup>1</sup> | 63.6 (40.8-82) <sup>1</sup>    |
| Ramamurthy 1996 (MAb-based)                 | 95   |              | 69.9 (57.9-79.8) <sup>1</sup> | 81.8 (59-94) <sup>1</sup>      |
| Ramamurthy 1993                             | 123  |              | 82.9 (71.6-90.5) <sup>1</sup> | 79.2 (65.5-88.7) <sup>1</sup>  |
| Ramamurthy 1992                             | 75   |              | 84.7 (72.5-92.5) <sup>1</sup> | 81.3 (53.7-95) <sup>1</sup>    |

<sup>1</sup> Confidence Intervals not provided; calculated from raw numbers

34 Figure 5. Plot of sensitivities and specificities for individual studies. Each dot represents a single study result, sub-grouped by colour according to type of ELISA test, as per the legend below.  
35 Error bars show 95% Confidence Intervals

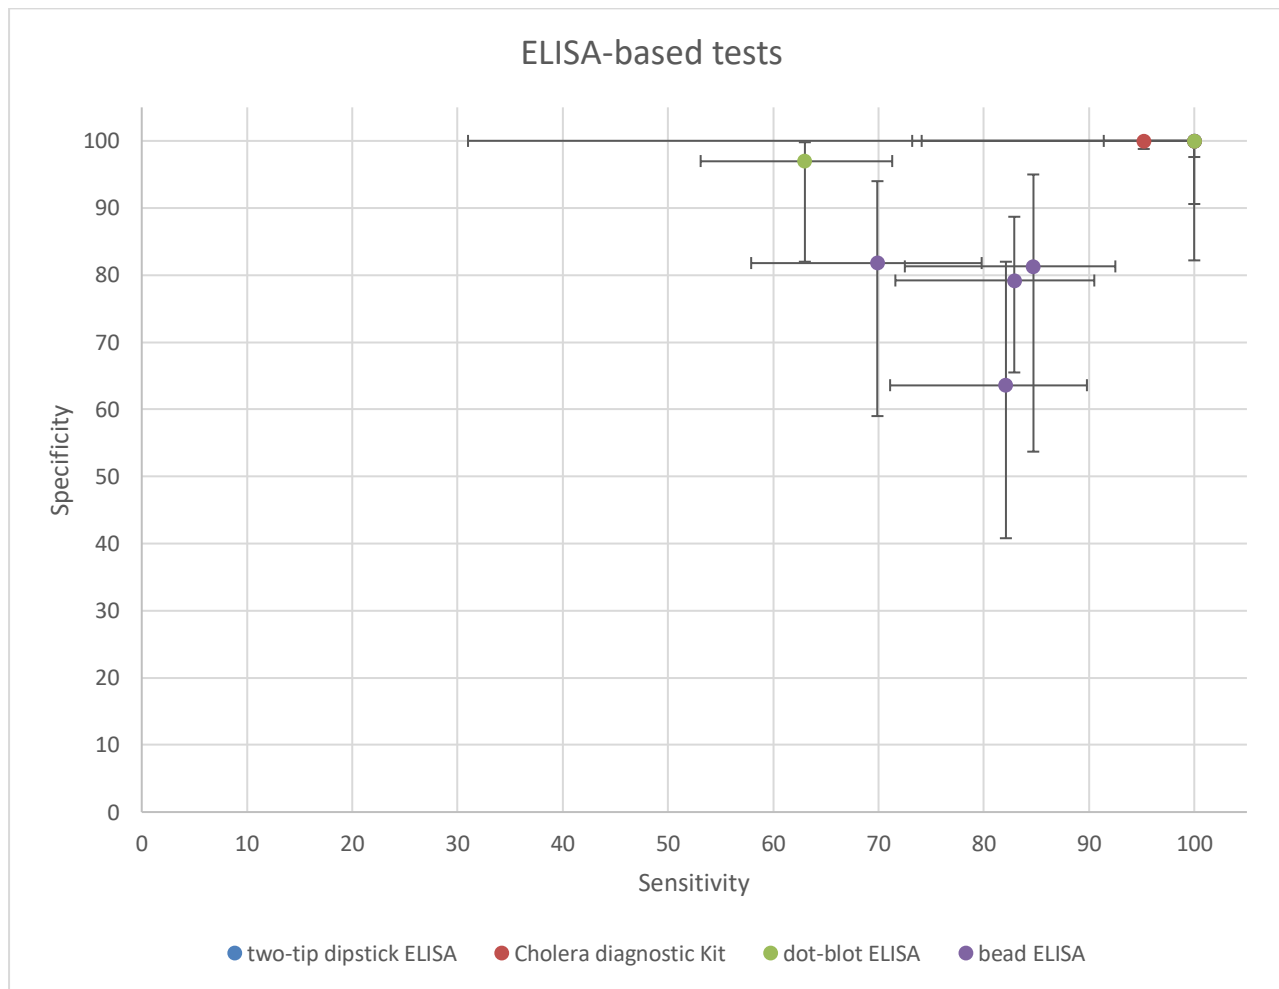

36

37

38 **Other tests**39 *Table 6. Sensitivity and specificity results for individual studies reporting on other tests not mentioned above*

| <b>Test: Other tests</b>        |                              |                                                        |          |                                                       |                               |                               |
|---------------------------------|------------------------------|--------------------------------------------------------|----------|-------------------------------------------------------|-------------------------------|-------------------------------|
| <b>Intended Location: Field</b> |                              |                                                        |          |                                                       |                               |                               |
| <b>Reference test: Culture</b>  |                              |                                                        |          |                                                       |                               |                               |
| <b>Sample type: Stool</b>       |                              |                                                        |          |                                                       |                               |                               |
| <b>Study</b>                    | <b>Test name</b>             | <b>Target</b>                                          | <b>n</b> | <b>Enrichment and sub-group details (if relevant)</b> | <b>Sensitivity</b>            | <b>Specificity</b>            |
| <i>Direct Samples</i>           |                              |                                                        |          |                                                       |                               |                               |
| Kalluri 2006                    | Medicos Cholera Dip Stick    | Unknown                                                | 304      | Field technicians                                     | 84 (77-91)                    | 79 (73-85)                    |
| Kalluri 2006                    | Medicos Cholera Dip Stick    | Unknown                                                | 303      | Lab technicians                                       | 88 (81-94)                    | 80 (73-95)                    |
| Bolaños 2004                    | PDK (Pathogen Detection Kit) | Antigen A of <i>V. cholerae</i> O1 lipopolysaccharide  | 27       | High probability specimens                            | 100 (71.7-100) <sup>1</sup>   | 86 (56.2-97.5) <sup>1</sup>   |
| Qadri 1995                      | Bengal SMART                 | A' factor of <i>V. cholerae</i> O139                   | 189      |                                                       | 97 (89.5-99.1) <sup>1</sup>   | 100 (95.5-100) <sup>1</sup>   |
| Hasan 1995                      | BengalScreen                 | lipopolysaccharide antigen of <i>V. cholerae</i> O139  | 35       |                                                       | 95 (71.9-99.7) <sup>1</sup>   | 100 (75.9-100) <sup>1</sup>   |
| Hasan 1995                      | Bengal DFA                   | lipopolysaccharide antigen of <i>V. cholerae</i> O139  | 35       |                                                       | 100 (79.1-100) <sup>1</sup>   | 100 (75.9-100) <sup>1</sup>   |
| Qadri 1994                      | co-agglutination test (COAT) | lipopolysaccharide antigens of <i>V. cholerae</i> O139 | 230      |                                                       | 92 (84.1-96.5) <sup>1</sup>   | 100 (96.7-100) <sup>1</sup>   |
| Carillo 1994                    | latex agglutination test     | A' factor of <i>V. cholerae</i> lipopolysaccharide O1  | 100      |                                                       | 100 (94.4-100) <sup>1</sup>   | 33 (14.4-58.8) <sup>1</sup>   |
| Islam 2019                      | Cholkit                      | lipopolysaccharide antigen of <i>V. cholerae</i> O1    | 1355     |                                                       | 79.4 (62.1-91.3)              | 87.4 (85.5-89.1)              |
| Sayeed 2018                     | Cholkit                      | lipopolysaccharide antigen of <i>V. cholerae</i> O1    | 76       |                                                       | 97.7 (88.4-99.9) <sup>2</sup> | 96.5 (88.6-99.6) <sup>2</sup> |
| Matias 2017                     | Artron RDT                   | <i>Vibrio cholerae</i> O1 and O139                     | 129      |                                                       | 98.6 (92.7-100)               | 69.1 (55.2-80.9)              |
| Matias 2017                     | SD Bioline                   | <i>V. cholerae</i> O1 and O139 antigens                | 451      |                                                       | 81.1 (75.6-85.8)              | 92.8 (88.4-95.9)              |

|                                         |                                                 |                                                |     |      |                             |                             |
|-----------------------------------------|-------------------------------------------------|------------------------------------------------|-----|------|-----------------------------|-----------------------------|
| <i>Enriched Samples</i>                 |                                                 |                                                |     |      |                             |                             |
| Islam 2019                              | Cholkit                                         | lipopolysaccharide antigen of V. cholerae O1   | 424 |      | 66.7 (47.2-82.7)            | 94.4 (91.7-96.5)            |
| <b>Reference test: Culture plus PCR</b> |                                                 |                                                |     |      |                             |                             |
| <b>Sample type: Stool</b>               |                                                 |                                                |     |      |                             |                             |
| <i>Direct Samples</i>                   |                                                 |                                                |     |      |                             |                             |
| Mwaba 2018                              | SD Bioline                                      | V. cholerae O1 and O139 antigens               | 170 |      | 90.9 (81.3-96.6)            | 95.2 (89.1-98.4)            |
| <i>Enriched Samples</i>                 |                                                 |                                                |     |      |                             |                             |
| Mwaba 2018                              | SD Bioline                                      | V. cholerae O1 and O139 antigens               | 170 |      | 95.5 (87.3-99.1)            | 100 (96.5-100)              |
| <b>Reference test: Combination</b>      |                                                 |                                                |     |      |                             |                             |
| <b>Sample type: Water</b>               |                                                 |                                                |     |      |                             |                             |
| <i>Direct Samples</i>                   |                                                 |                                                |     |      |                             |                             |
| Hao 2017                                | Vch-UPT-LF                                      | V. cholerae O1 or O139                         | 96  | O1   | 100 (71.7-100) <sup>1</sup> | 100 (94.5-100) <sup>1</sup> |
| Hao 2017                                | Vch-UPT-LF                                      | V. cholerae O1 or O139                         | 96  | O139 | 100 (19.8-100) <sup>1</sup> | 99 (93.4-99.9) <sup>1</sup> |
| <b>Test: Other tests</b>                |                                                 |                                                |     |      |                             |                             |
| <b>Intended Location: Laboratory</b>    |                                                 |                                                |     |      |                             |                             |
| <b>Reference test: Culture</b>          |                                                 |                                                |     |      |                             |                             |
| <b>Sample type: Stool</b>               |                                                 |                                                |     |      |                             |                             |
| <i>Direct Samples</i>                   |                                                 |                                                |     |      |                             |                             |
| Hasan 1994a                             | Cholera DFA                                     | A' factor of V. cholerae lipopolysaccharide O1 | 44  |      | 100 (82.2-100) <sup>1</sup> | 100 (80.8-100) <sup>1</sup> |
| <b>Reference test: Combination</b>      |                                                 |                                                |     |      |                             |                             |
| <b>Sample type: Stool</b>               |                                                 |                                                |     |      |                             |                             |
| <i>Direct Samples</i>                   |                                                 |                                                |     |      |                             |                             |
| Jin 2013                                | CT-RTCA (cholera toxin real-time cell analysis) | Cholera toxin                                  | 100 |      | 90 (72.3-97.4) <sup>1</sup> | 97 (89.1-99.5) <sup>1</sup> |
| Eddabra 2011                            | ChromID Vibrio                                  | V. cholerae bacterial strains                  | 30  |      | 79 (48.8-94.3) <sup>1</sup> | 100 (75.9-100) <sup>1</sup> |

|                         |                |                               |    |                   |                             |                             |
|-------------------------|----------------|-------------------------------|----|-------------------|-----------------------------|-----------------------------|
| Eddabra 2011            | TCBS           | V. cholerae bacterial strains | 30 |                   | 79 (48.8-94.3) <sup>1</sup> | 50 (25.5-74.5) <sup>1</sup> |
| <i>Enriched Samples</i> |                |                               |    |                   |                             |                             |
| Eddabra 2011            | ChromID Vibrio | V. cholerae bacterial strains | 30 | Yes - 5-8h in APW | 100 (73.2-100) <sup>1</sup> | 100 (75.9-100) <sup>1</sup> |
| Eddabra 2011            | TCBS           | V. cholerae bacterial strains | 30 | Yes - 5-8h in APW | 100 (73.2-100) <sup>1</sup> | 50 (25.5-74.5) <sup>1</sup> |

<sup>1</sup> Confidence Intervals not provided; calculated from raw numbers

<sup>2</sup> Result estimated using Bayesian Latent Modelling

41 Figure 6. Plot of sensitivities and specificities for individual studies. Each dot represents a single study result, sub-grouped by colour according to type test, as per the legend below. Error bars  
 42 show 95% Confidence Intervals

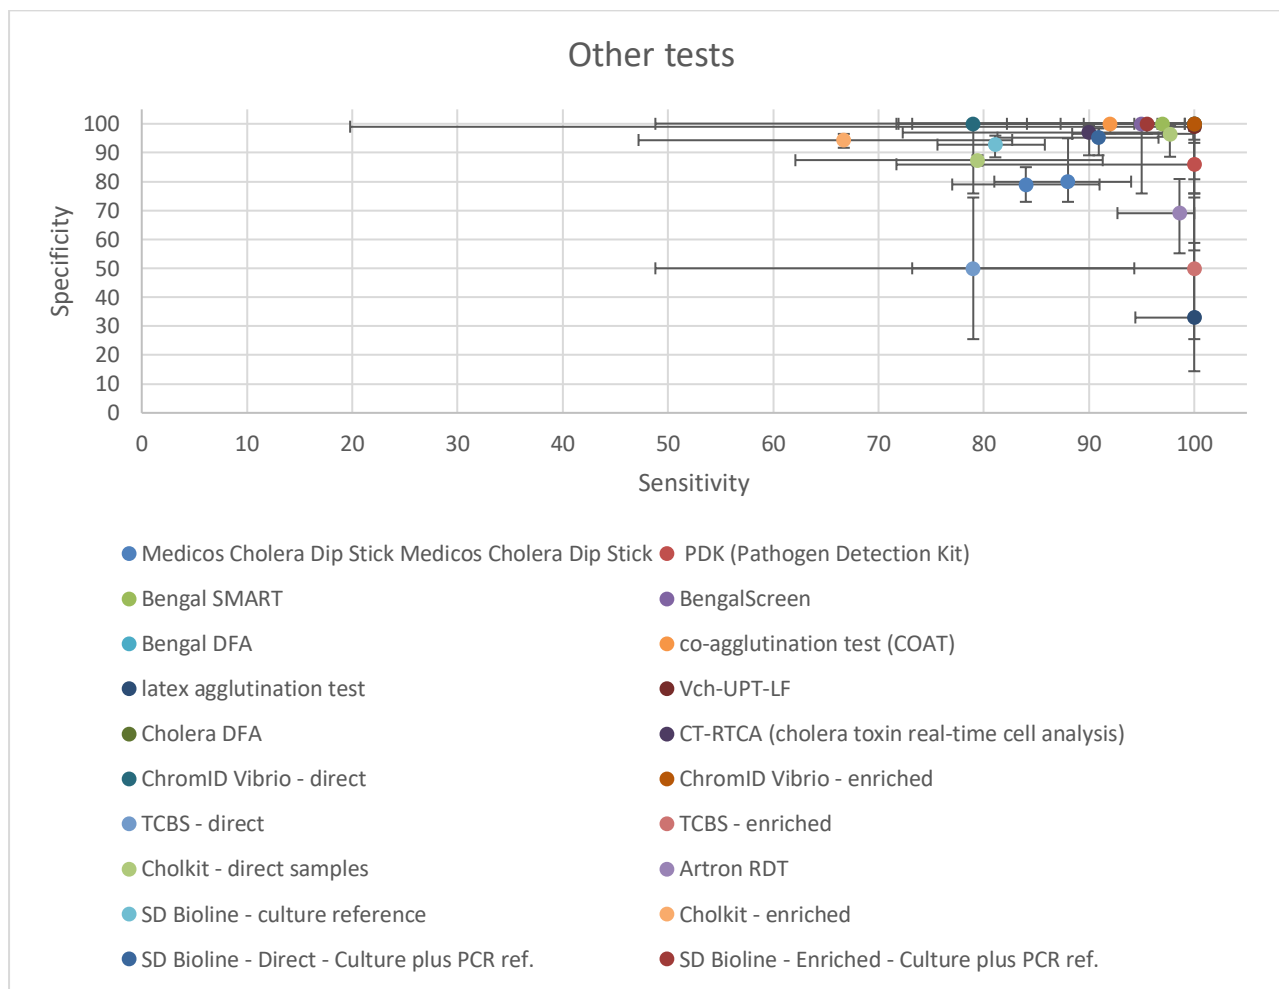

43  
 44  
 45



46 **PCR-based tests**47 *Table 7. Sensitivity and specificity results for individual studies reporting on PCR-based tests*

| <b>Test: PCR-based tests</b>              |                                                                                                                              |                                                                        |          |                                                       |                               |                               |
|-------------------------------------------|------------------------------------------------------------------------------------------------------------------------------|------------------------------------------------------------------------|----------|-------------------------------------------------------|-------------------------------|-------------------------------|
| <b>Intended Location: laboratory</b>      |                                                                                                                              |                                                                        |          |                                                       |                               |                               |
| <b>Reference test: Culture</b>            |                                                                                                                              |                                                                        |          |                                                       |                               |                               |
| <b>Sample type: Stool</b>                 |                                                                                                                              |                                                                        |          |                                                       |                               |                               |
| <b>Study</b>                              | <b>Test name</b>                                                                                                             | <b>Target</b>                                                          | <b>n</b> | <b>Enrichment and sub-group details (if relevant)</b> | <b>Sensitivity</b>            | <b>Specificity</b>            |
| <i>Direct Samples</i>                     |                                                                                                                              |                                                                        |          |                                                       |                               |                               |
| Albert 1997                               | PCR assay (with new primers O139-1 and O139-2)                                                                               | V. cholerae O139                                                       | 180      | Undiluted sample                                      | 94 (84.7-98.1) <sup>1</sup>   | 100 (95.9-100) <sup>1</sup>   |
| Sayed 2018                                | Multiplex PCR                                                                                                                | V. cholerae O1 and O139 specific rfb genes and cholera toxin gene ctxA | 76       |                                                       | 73.6 (58.5-85.7) <sup>2</sup> | 97.2 (93.2-99.2) <sup>2</sup> |
| <i>Enriched Samples</i>                   |                                                                                                                              |                                                                        |          |                                                       |                               |                               |
| Hoshino 1998                              | Multiplex PCR (with: O139-rfb primers - O139F-2, O139R-2; O1-rfb primers - O1F-2, O1R-2; cholera toxin primers - VCT1, VCT2) | V. cholerae O1 and O139 rfb-specific genes and the ctxA gene.          | 121      | 18h in APW                                            | 100 (88.6-100) <sup>1</sup>   | 95 (87.5-98.4) <sup>1</sup>   |
| Ramamurthy 1993                           | PCR (with primers specific to V. cholera O1)                                                                                 | Cholera Toxin gene of V. cholerae O1.                                  | 123      | 18h in APW                                            | 100 (93.5-100) <sup>1</sup>   | 55 (40.6-68.2) <sup>1</sup>   |
| <b>Reference test: Culture</b>            |                                                                                                                              |                                                                        |          |                                                       |                               |                               |
| <b>Sample type: Water</b>                 |                                                                                                                              |                                                                        |          |                                                       |                               |                               |
| <i>Enriched Samples</i>                   |                                                                                                                              |                                                                        |          |                                                       |                               |                               |
| Momtaz 2013                               | PCR (with primers specific to espM gene)                                                                                     | espM gene of V. cholerae                                               | 448      | 6-8h in APW                                           | 100 (31-100) <sup>1</sup>     | 100 (98.9-100) <sup>1</sup>   |
| <b>Reference test: Conventional assay</b> |                                                                                                                              |                                                                        |          |                                                       |                               |                               |
| <b>Sample type: Stool</b>                 |                                                                                                                              |                                                                        |          |                                                       |                               |                               |
| <i>Direct Samples</i>                     |                                                                                                                              |                                                                        |          |                                                       |                               |                               |

|                                    |                   |           |     |  |                             |                             |
|------------------------------------|-------------------|-----------|-----|--|-----------------------------|-----------------------------|
| Liu 2013                           | Taqman array Card | toxR gene | 80  |  | 100 (59.8-100) <sup>1</sup> | 100 (93.7-100) <sup>1</sup> |
| <b>Reference test: PCR Luminex</b> |                   |           |     |  |                             |                             |
| <b>Sample type: Stool</b>          |                   |           |     |  |                             |                             |
| <i>Direct Samples</i>              |                   |           |     |  |                             |                             |
| Liu 2013                           | Taqman array Card | toxR gene | 109 |  | 100 (62.9-100) <sup>1</sup> | 100 (95.4-100) <sup>1</sup> |

<sup>1</sup> Confidence Intervals not provided; calculated from raw numbers

<sup>2</sup> Result estimated using Bayesian Latent Modelling

49 Figure 7. Plot of sensitivities and specificities for individual studies. Each dot represents a single study result, sub-grouped by colour according to type PCR test and reference or enrichment  
50 status, as per the legend below. Error bars show 95% Confidence Intervals.

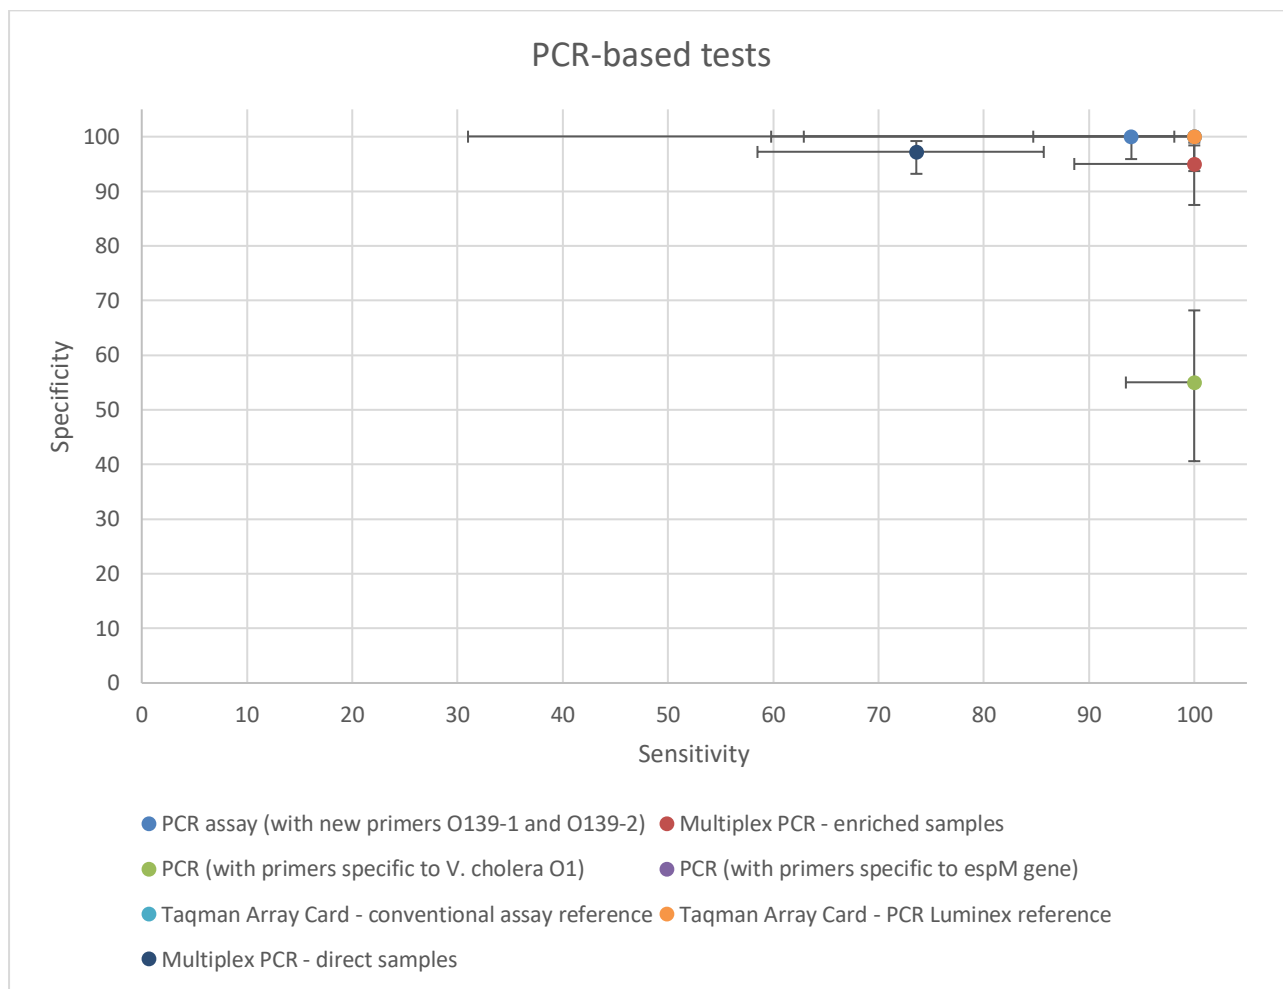

51

52
