# Supplementary material for: Cholera diagnosis in human stool and detection in water: A systematic review and meta-analysis
Source: PubMed Central journal article supplement (PMC9258865; doi:10.1371/journal.pone.0270860), 2022-07-06
Supplement: pone.0270860.s006.pdf [file pone.0270860.s006.pdf]

1 **Appendix S6: Risk of bias and applicability – results by study**

2

| Study ID                                              | Sample selection                                 | Index test                                                       | Reference test                                                                        | Sample flow                                 |
|-------------------------------------------------------|--------------------------------------------------|------------------------------------------------------------------|---------------------------------------------------------------------------------------|---------------------------------------------|
|                                                       | Could the sample selection have introduced bias? | Could the interpretation of the index test have introduced bias? | Could the reference standard, its conduct or its interpretation have introduced bias? | Could the sample flow have introduced bias? |
| Albert 1997 [19]                                      | Unclear                                          | Low                                                              | Low <sup>1</sup>                                                                      | Low                                         |
| Bhuiyan 2003 [20]                                     | Low                                              | High                                                             | Low <sup>1</sup>                                                                      | Low                                         |
| Bolaños 2004 [21] (Cholera SMART index test)          | Unclear                                          | High                                                             | Low <sup>1</sup>                                                                      | Low                                         |
| Bolaños 2004 [21] (Pathogen Detection Kit index test) | Unclear                                          | High                                                             | Low <sup>1</sup>                                                                      | Low                                         |
| Bwire 2017 [22]                                       | Low                                              | High                                                             | Low <sup>1</sup>                                                                      | Low                                         |
| Carillo 1994 [23] (Cholera Screen index test)         | Unclear                                          | High                                                             | Low <sup>1</sup>                                                                      | Low                                         |
| Carillo 1994 [23] (latex agglutination index test)    | Unclear                                          | High                                                             | Low <sup>1</sup>                                                                      | Low                                         |
| Chaicumpa 1995 [24]                                   | Unclear                                          | Low                                                              | Low <sup>1</sup>                                                                      | Low                                         |
| Chaicumpa 1998 [25]                                   | Unclear                                          | Low                                                              | Low <sup>1</sup>                                                                      | Low                                         |
| Chakraborty 2013 [26]                                 | Unclear                                          | High                                                             | Low <sup>1</sup>                                                                      | Low                                         |
| Colwell 1992 [27]                                     | Unclear                                          | Low                                                              | Low <sup>1</sup>                                                                      | Low                                         |
| Debes 2016 [28]                                       | Low                                              | Low                                                              | Low                                                                                   | High                                        |
| Eddabra 2011 [29] (ChromID Vibrio index test)         | Unclear                                          | Low                                                              | Unclear                                                                               | Low                                         |
| Eddabra 2011 [29] (TCBS index test)                   | Unclear                                          | Low                                                              | Unclear                                                                               | Low                                         |
| George 2014 [30]                                      | Low                                              | Low                                                              | Low                                                                                   | Low                                         |
| Hao 2017 [31]                                         | Unclear                                          | High                                                             | Unclear                                                                               | Low                                         |
| Harris 2009 [32]                                      | Low                                              | Low                                                              | Low                                                                                   | Low                                         |
| Hasan 1994a [33]                                      | Low                                              | Low                                                              | Low <sup>1</sup>                                                                      | Low                                         |
| Hasan 1994b [34] (Culture reference)                  | Unclear                                          | Low                                                              | Low <sup>1</sup>                                                                      | Low                                         |
| Hasan 1994b [34] (Cholera Screen reference)           | Unclear                                          | Low                                                              | Low                                                                                   | Low                                         |

|                                                         |         |         |                  |      |
|---------------------------------------------------------|---------|---------|------------------|------|
| Hasan 1995 [35] (BengalScreen index test)               | Low     | Unclear | Low <sup>1</sup> | Low  |
| Hasan 1995 [35] (BengalDFA index test)                  | Low     | Unclear | Low <sup>1</sup> | Low  |
| Hoshino 1998 [36]                                       | Unclear | Low     | Low <sup>1</sup> | Low  |
| Islam 1994 [37]                                         | Unclear | High    | Low <sup>1</sup> | Low  |
| Islam 2019 [38] (Crystal VC)                            | Low     | Low     | Low <sup>1</sup> | Low  |
| Islam 2019 [38] (Cholkit)                               | Low     | Low     | Low <sup>1</sup> | Low  |
| Jin 2013 [39]                                           | Unclear | Low     | Unclear          | Low  |
| Kalluri 2006 [40] (Cholera SMART index test)            | Low     | Low     | Low <sup>1</sup> | Low  |
| Kalluri 2006 [40] (IP dipstick index test)              | Low     | Low     | Low <sup>1</sup> | Low  |
| Kalluri 2006 [40] (Medicos Cholera dipstick index test) | Low     | Low     | Low <sup>1</sup> | Low  |
| Ley 2012 [41]                                           | Low     | Low     | Low <sup>1</sup> | Low  |
| Liu 2013 [42] (conventional assay reference)            | Unclear | Low     | Low              | High |
| Liu 2013 [42] (PCR Luminex reference)                   | Unclear | Low     | Low              | Low  |
| Matias 2017 [43] (Artron RDT)                           | Low     | High    | Low <sup>1</sup> | Low  |
| Matias 2017 [43] (Crystal VC)                           | Low     | High    | Low <sup>1</sup> | High |
| Matias 2017 [43] (SD Bioline)                           | Low     | High    | Low <sup>1</sup> | High |
| Momtaz 2013 [44]                                        | Unclear | Low     | Low <sup>1</sup> | Low  |
| Mukherjee 2010 [45]                                     | Low     | Low     | Low <sup>1</sup> | Low  |
| Mwaba 2018 [46]                                         | Low     | Low     | Low              | Low  |
| Nato 2003 [47]                                          | Unclear | High    | Low <sup>1</sup> | Low  |
| Ontweka 2016 [10]                                       | Low     | Low     | Low              | Low  |
| Page 2012 [48] (culture reference)                      | Low     | Low     | Low <sup>1</sup> | Low  |
| Page 2012 [48] (culture or PCR reference)               | Low     | Low     | Low              | Low  |
| Qadri 1994 [49]                                         | Unclear | High    | Low <sup>1</sup> | Low  |
| Qadri 1995 [50]                                         | Unclear | High    | Low <sup>1</sup> | Low  |
| Ramamurthy 1992 [51]                                    | Low     | Low     | Low <sup>1</sup> | Low  |
| Ramamurthy 1993 [52] (PCR index test)                   | Low     | Low     | Low <sup>1</sup> | Low  |
| Ramamurthy 1993 [52] (Bead-ELISA index test)            | Low     | Low     | Low              | Low  |
| Ramamurthy 1996 [53]                                    | Unclear | Low     | Low <sup>1</sup> | Low  |

|                                 |         |         |                  |     |
|---------------------------------|---------|---------|------------------|-----|
| Rashid 2017 [1]                 | Low     | Unclear | Low <sup>1</sup> | Low |
| Sayed 2018 [54] (Cholkit)       | Unclear | High    | Low <sup>1</sup> | Low |
| Sayed 2018 [54] (Crystal VC)    | Unclear | High    | Low <sup>1</sup> | Low |
| Sayed 2018 [54] (Multiplex PCR) | Unclear | Low     | Low <sup>1</sup> | Low |
| Supawat 1994 [55]               | Unclear | Low     | Low <sup>1</sup> | Low |
| Tuteja 2007 [56]                | Low     | Unclear | Low              | Low |
| Wang 2006 [57]                  | Low     | High    | Low <sup>1</sup> | Low |

3
